# Supplementary material for: Generation of covalent organic framework-derived porous N-doped carbon nanosheets for highly efficient electrocatalytic hydrogen evolution
Source: Royal Society of Chemistry journal article supplement (doi:10.1039/d3ya00325f), 2023-01-01
Supplement: d3ya00325f1.pdf [file d3ya00325f1.pdf]

*Electronic supplementary information*

*for*

**Generation of covalent organic framework-derived porous N-doped carbon  
nanosheets for highly efficient electrocatalytic hydrogen evolution**

Sayan Halder,<sup>a</sup> Anup Kumar Pradhan,<sup>a</sup> Soumen Khan,<sup>a,b</sup> and Chanchal Chakraborty<sup>\*,a,b</sup>

<sup>a</sup> Department of Chemistry, Birla Institute of Technology & Science (BITS) Pilani,  
Hyderabad Campus. Jawaharnagar, Samirpet, Hyderabad, Telangana 500078, India.

<sup>b</sup> Materials Center for Sustainable Energy & Environment (McSEE), Birla Institute of  
Technology and Science, Hyderabad Campus, Hyderabad 500078, India

\*Corresponding Author: Chanchal Chakraborty

E-mail: [chanchal@hyderabad.bits-pilani.ac.in](mailto:chanchal@hyderabad.bits-pilani.ac.in)

ORCID ID: <https://orcid.org/0000-0002-4829-1367>

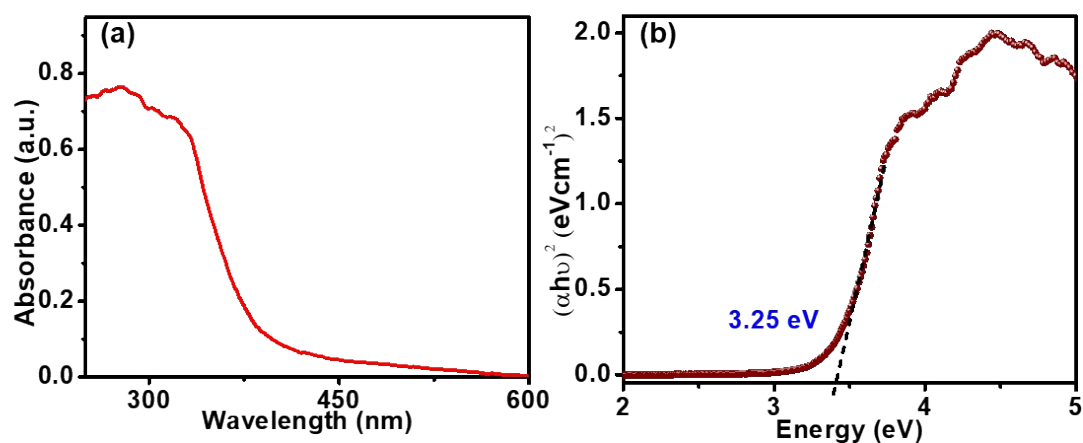

**Fig. S1** (a) Solid-state UV-vis spectra and (c) corresponding Kubelka-Munk plot for optical bandgap for TP-COF.

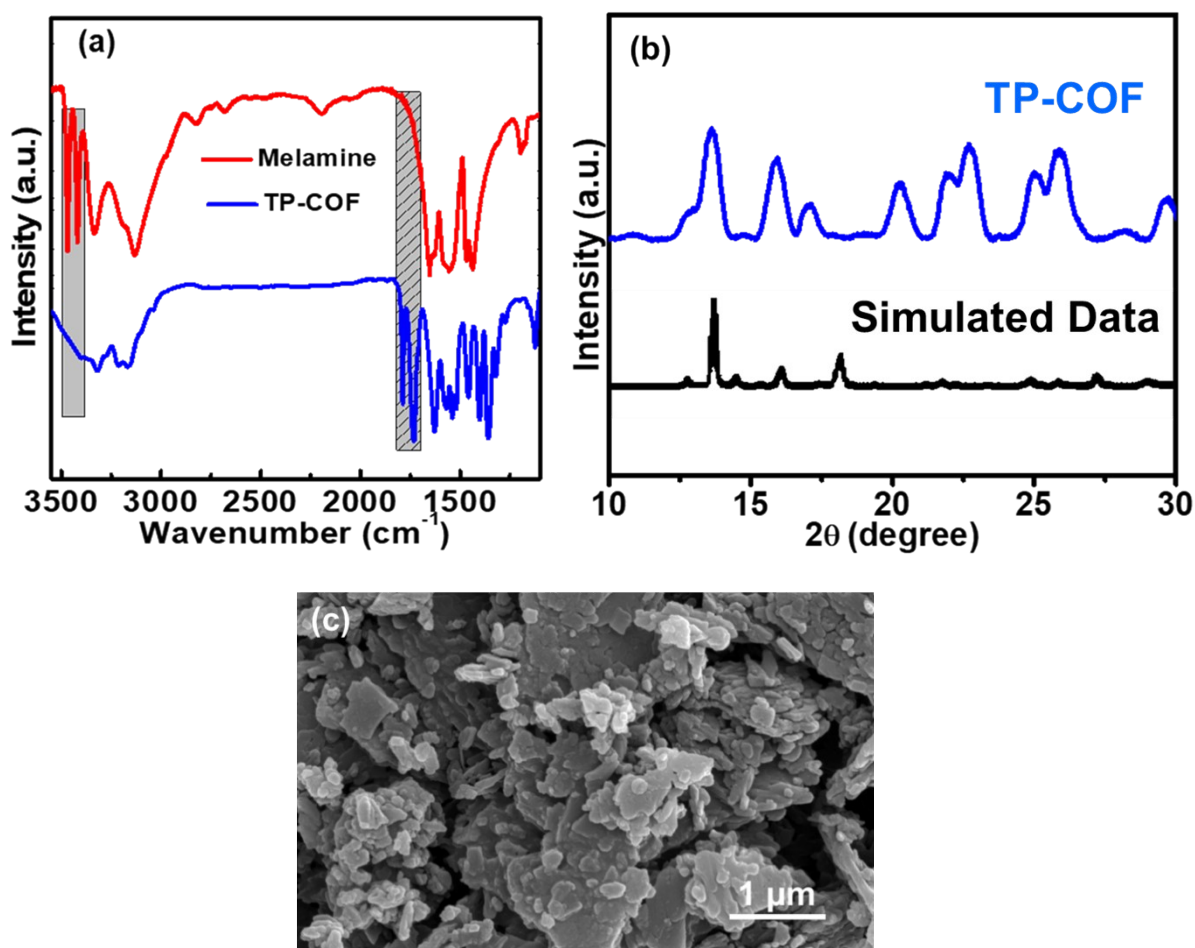

**Fig. S2** (a) FT-IR plots of melamine and TP-COF, (b) PXRD plot of TP-COF. The simulated data is referenced from earlier literature<sup>1</sup>. (c) FESEM image of TP-COF.

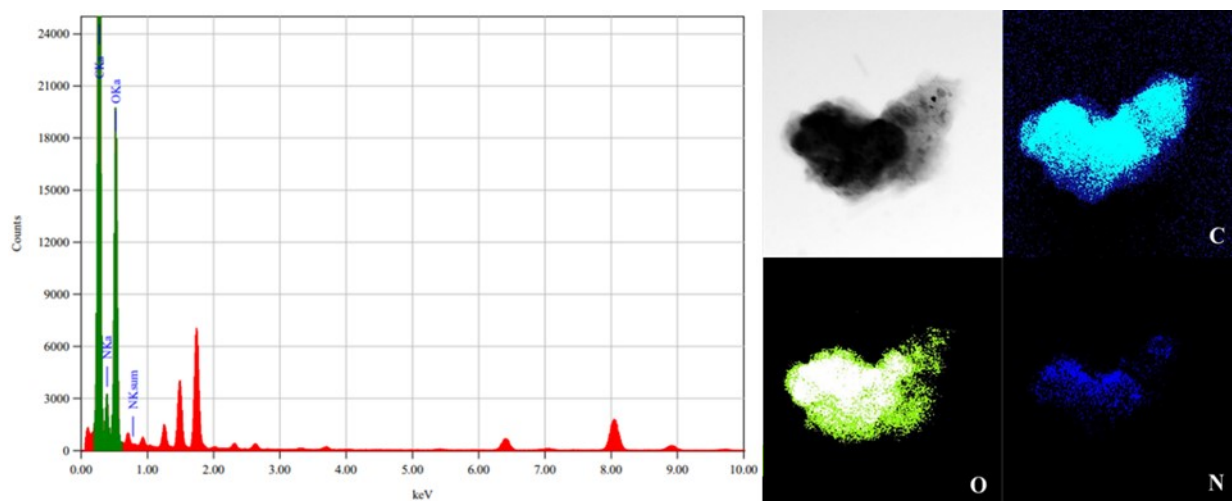

**Fig. S3** The overall TEM-EDX and elemental mapping of TP-COF and the individual elemental mapping of C, N, and O on the TP-COF surface.

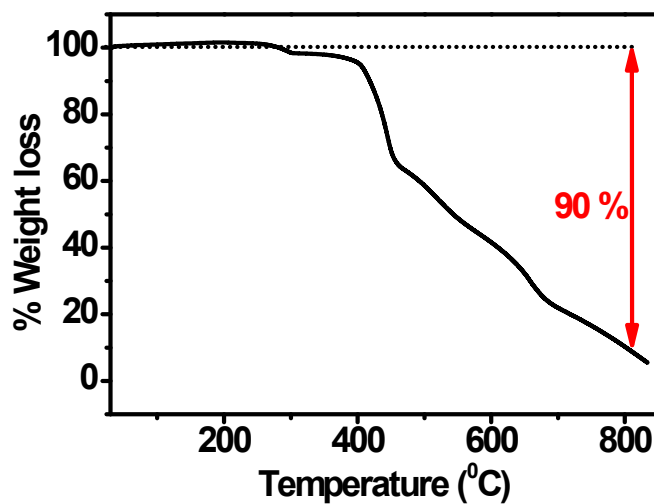

**Fig. S4** TGA thermograph of TP-COF under N<sub>2</sub> environment.

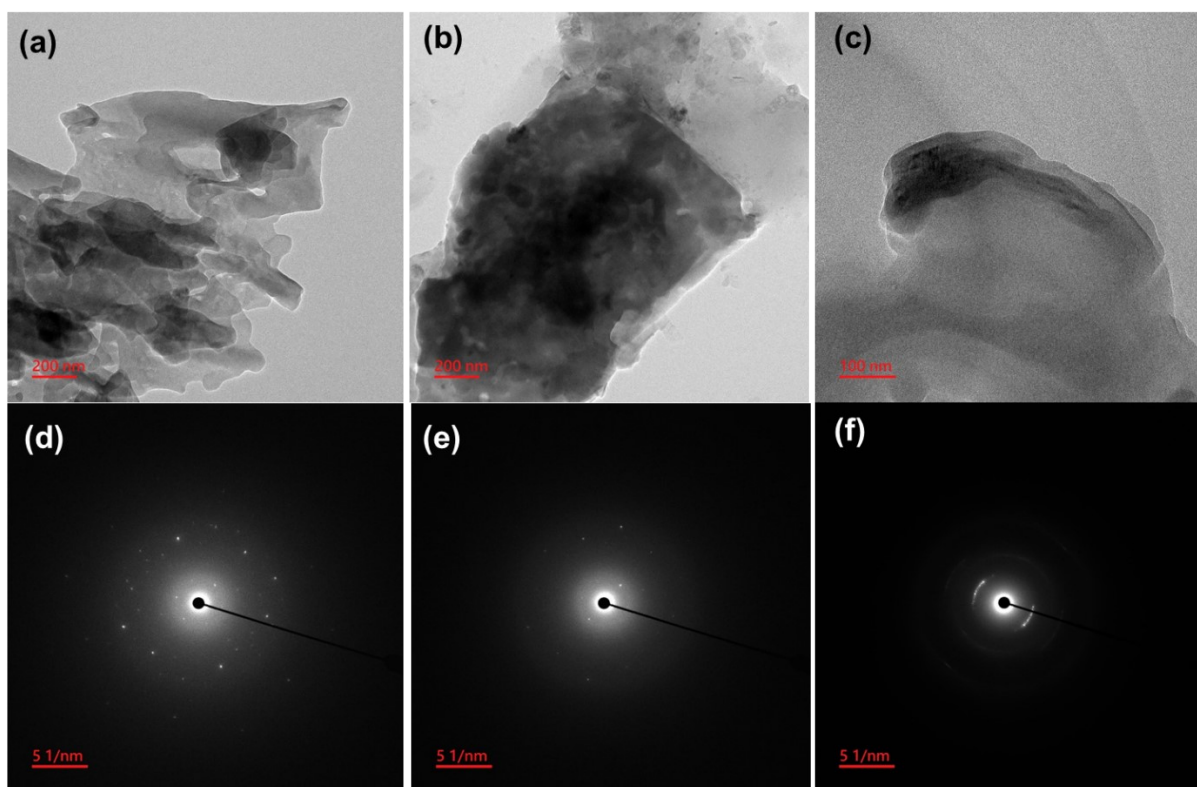

**Fig. S5** HRTEM of (a), (b), and (c) for TP-COF pyrolyzed at 400, 500, and 800 °C, respectively. Corresponding SAED images (d), (e), and (f) of TP-COF at 400, 500, and 800 °C, respectively.

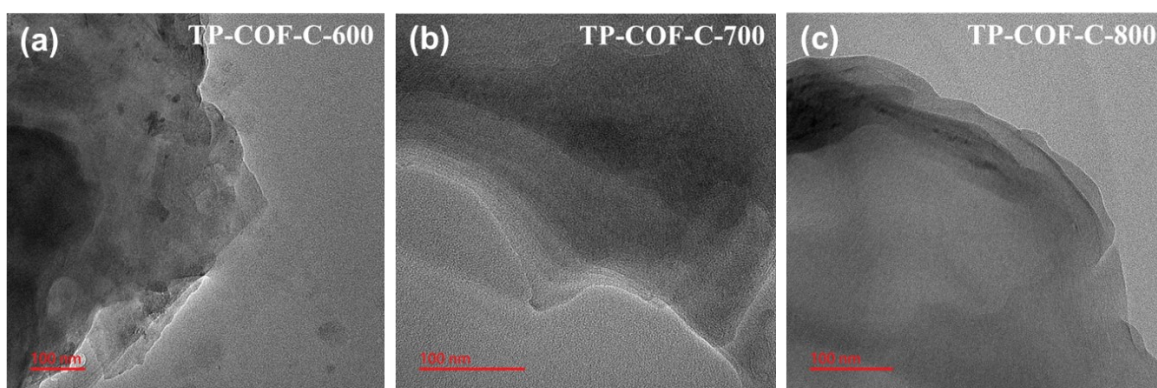

**Fig. S6.** TEM of (a) TP-COF-C-600, (b) TP-COF-C-700, and (c) TP-COF-C-800.

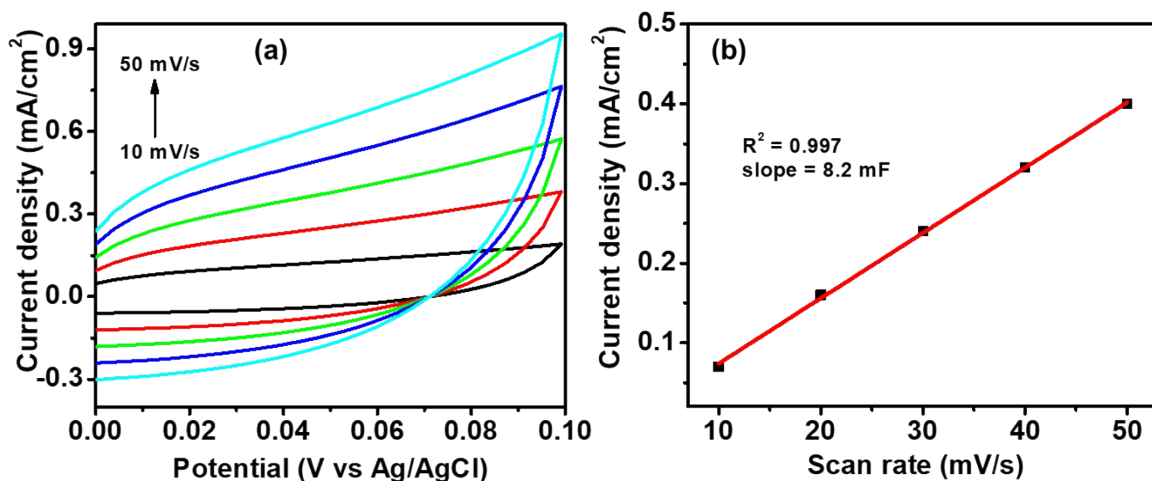

**Fig. S7.** (a) Scan rate dependant CV study and (b) average current density vs. scan rate plot of TP-COF-C700 in the non-faradic region (0 to 0.1 V vs. Ag/AgCl-sat. KCl) for the calculation of  $C_{dl}$ .

#### **Faradic Efficiency (FE) calculation of HER for TP-COF-C700:**

We have calculated the faradic efficiency of TP-COF-C700 using the following procedure. The chronoamperometry of TP-COF-C700 was conducted at a current density of -0.3 V (RHE) for 30 min.

So, charge passed (area under the curve of chronoamperometry) = 53.795 Coulomb

Again, 53.795 Coulomb =  $(53.795/96485)$  mole electron

Here, one hydrogen molecule was produced by involving 2 electrons transfer, so the theoretical hydrogen produced =  $(53.795/(96485 \times 2))$  mole

$$= (53.795 \times 22400) / (96485 \times 2) \text{ mL (1 mole gas = 22400 mL at STP)}$$

$$= 6.244 \text{ mL}$$

The amount of the hydrogen gas evolve was collected and measured in a centrifuged vial by water displacement. The Faradic Efficiency (FE) or HER reaction was calculated using the following equation.

$$\text{FE} = (\text{amount of H}_2 \text{ evolved (mL)} \times 100) / \text{Theoretical yield of H}_2 \text{ (mL)}$$

$$\text{FE} = (6.1 \times 100) / 6.244$$

$$\text{FE} = 98 \%$$

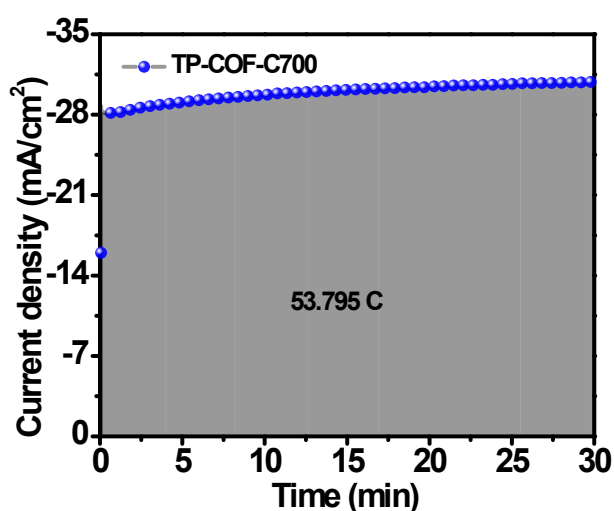

**Fig. S8** (a) Chronoamperometry plot of TP-COF-C700 at -0.3 V (vs. RHE) potential for 30 min.

**Table S1.** Comparison of XPS-based surface elemental composition.

| Materials    | % C   | % N   | % O   |
|--------------|-------|-------|-------|
| TP-COF       | 56.64 | 18.81 | 24.55 |
| TP-COF-C-700 | 80.15 | 12.01 | 7.84  |

**Table S2.** Comparison of electrocatalytic performance of different electrode materials.

| Materials                                    | Overpotential (mV) @<br>10 mA/cm <sup>2</sup> | Tafel slope<br>(mV/Dec) | References       |
|----------------------------------------------|-----------------------------------------------|-------------------------|------------------|
| Pt electrode                                 | 60                                            | 31                      | 2-4              |
| CoP-2ph-CMP-800                              | 360                                           | 121                     | 5                |
| Cu-MOF                                       | 209                                           | 84                      | 6                |
| N, P-graphene                                | 420                                           | 91                      | 7                |
| P-doped graphene                             | 533                                           | 133                     | 7                |
| N-doped graphene                             | 490                                           | 116                     | 7                |
| F-CTF-1-AA                                   | 200                                           | 97                      | 8                |
| g-C <sub>3</sub> N <sub>4</sub> nanoribbon-G | 207                                           | 54                      | 9                |
| THTNi 2DSP                                   | 333                                           | 80.5                    | 10               |
| N,P,O doped porous carbon                    | 233                                           | 275                     | 11               |
| TAT-TFBE                                     | 222                                           | 73                      | 12               |
| <b>TP-COF-C700</b>                           | <b>94</b>                                     | <b>128</b>              | <b>This work</b> |

**References.**

1. H. Duan, P. Lyu, J. Liu, Y. Zhao, and Y. Xu, Semiconducting Crystalline Two-Dimensional Polyimide Nanosheets with Superior Sodium Storage Properties, *ACS Nano* 2019, **13**, 2473–2480.
2. B.E. Conway, G. Jerkiewicz, Relation of energies and coverages of underpotential and overpotential deposited H at Pt and other metals to the ‘volcano curve’ for cathodic H<sub>2</sub> evolution kinetics, *Electrochim. Acta*, 2000, **45**, 4075-4083.

3. K. Kunitatsu, T. Senzaki, M. Tsushima, M. A. Osawa, Combined surface-enhanced infrared and electrochemical kinetics study of hydrogen adsorption and evolution on a Pt electrode, *Chem. Phys. Lett.*, 2005, **401**, 451-454.
4. E. S. Lason, G. S. Karlberg, J. Rossmeisl, T. Bligaard, J. Greeley, H. J. Nsson, J. K. Nørskov, Density functional theory calculations for the hydrogen evolution reaction in an electrochemical double layer on the Pt (111) electrode, *Phys. Chem. Chem. Phys.*, 2007, **9**, 3241-3250.
5. H. Jia, Y. Yao, Y. Gao, D. Lu, P. Du, Pyrolyzed cobalt porphyrin-based conjugated mesoporous polymers as bifunctional catalysts for hydrogen production and oxygen evolution in water, *Chem. Commun.*, 2016, **52**, 13483-13486.
6. M. Jahan, Z. Liu, K. P. A. Loh, Graphene oxide and copper-centered metal organic framework composite as a tri-functional catalyst for HER, OER, and ORR, *Adv. Funct. Mater.*, 2013, **23**, 5363-5372.
7. Y. Zheng, Y. Jiao, L. Li, Y. Xing, Y. Chen, M. Jaroniec, S. Z. Qiao, Toward design of synergistically active carbon-based catalysts for electrocatalytic hydrogen evolution, *ACS Nano*, 2014, **8**, 5290-5296.
8. Y. Zhao, T. Li, J. Gu, B. Zhang, P. Zhai, Z. Xue, H. Gao, Q. Li, Covalent triazine frameworks based on different stacking model as electrocatalyst for hydrogen evolution, *Appl. Surface Sci.*, 2023, **618**, 156697.
9. Y. Zhao, F. Zhao, X. Wang, C. Xu, Z. Zhang, G. Shi, L. Qu, Graphitic carbon nitride nanoribbons: graphene-assisted formation and synergic function for highly efficient hydrogen evolution, *Angew. Chem. Int. Ed.*, 2014, **53**, 13934-13939.



10. R. Dong, M. Pfeffermann, H. Liang, Z. Zheng, X. Zhu, J. Zhang, X. Feng, Large-area, free-standing, two-dimensional supramolecular polymer single-layer sheets for highly efficient electrocatalytic hydrogen evolution, *Angew. Chem. Int. Ed.*, 2015, **54**, 12058-12063.
11. Y. Zhang, L. Chen, L. Hou, X. Liu, N-, P-, and O-doped porous carbon as advanced trifunctional metal-free electrocatalysts, *Catal. Sci. Technol.*, 2023, **13**, 910-916.
12. S. Karak, K. Koner, A. Karmakar, S. Mohata, Y. Nishiyama, N. T. Duong, N. Thomas, T. G. Ajithkumar, M. S. Hossain, S. Bandyopadhyay, S. Kundu, Morphology Tuning via Linker Modulation: Metal-Free Covalent Organic Nanostructures with Exceptional Chemical Stability for Electrocatalytic Water Splitting, *Adv. Mater.*, 2023, 2209919.
